# Supplementary material for: Tourniquet and tranexamic acid use in total knee arthroplasty
Source: PubMed Central journal article supplement — Arthroplast Today. 2020 Apr 28;6(2):246–50. doi: 10.1016/j.artd.2020.02.007 (PMC7303488; doi:10.1016/j.artd.2020.02.007), 2020-04-28
Supplement: mmc1.pdf [file mmc1.pdf]

**CONFLICT OF INTEREST STATEMENT**

***American Association of Hip and Knee Surgeons***

(Adopted from the American Academy of Orthopaedic Surgeons disclosure statement)

The following form **must be filled out completely and submitted by each author (example, 6 authors, 6 forms).**  
**All items require a response. If there is no relevant disclosure for a given item, enter "None."**

Manuscript Title - Tourniquet and Tranexamic Acid Use in Total Knee Arthroplasty

1. Royalties from a company or supplier (The following conflicts were disclosed)  
OrthoSensor, Inc - Royalties
2. Speakers bureau/paid presentations for a company or supplier (The following conflicts were disclosed)  
OrthoSensor, Inc – Paid presentations
- 3A. Paid employee for a company or supplier (The following conflicts were disclosed) - None
- 3B. Paid consultant for a company or supplier (The following conflicts were disclosed) - None  
OrthoSensor, Inc - Consultant
- 3C. Unpaid consultants for a company or supplier (The following conflicts were disclosed) - None
4. Stock or stock options in a company or supplier (The following conflicts were disclosed)  
OrthoSensor, Inc - Stock
5. Research support from a company or supplier as a Principal Investigator (The following conflicts were disclosed)  
KCI – Research support  
Cerus – Research support
6. Other financial or material support from a company or supplier (The following conflicts were disclosed) - None
7. Royalties, financial or material support from publishers (The following conflicts were disclosed) - None
8. Medical/Orthopaedic publications editorial/governing board (The following conflicts were disclosed)  
Arthroplasty Today – Deputy Editor (stipend), Editorial board  
Journal of Arthroplasty – Editorial Board (Elite Reviewer)  
Geriatric Orthopaedic Surgery and Rehabilitation  
BMJ Open Access  
ACR Journal  
European Journal of Orthopaedic Surgery and Traumatology  
The Knee  
PlosOne
9. Board member/committee appointments for a society (The following conflicts were disclosed)  
Virginia Orthopaedic Society (VOS) – Board member  
AAHKS – Publications committee member

**Each author must sign AND print or type his/her name, date and submit a separate form**

In addition, one BLINDED Conflict of Interest form (no author names used) should be submitted per manuscript with all author disclosures.

Gregory Golladay

Author Name (Print or Type)

Author Signature

11/11/19

Date

**CONFLICT OF INTEREST STATEMENT**

***American Association of Hip and Knee Surgeons***

(Adopted from the American Academy of Orthopaedic Surgeons disclosure statement)

The following form **must be filled out completely and submitted by each author (example, 6 authors, 6 forms).**  
**All items require a response. If there is no relevant disclosure for a given item, enter "None."**

Manuscript Title - Tourniquet and Tranexamic Acid Use in Total Knee Arthroplasty

1. Royalties from a company or supplier (The following conflicts were disclosed) - None
2. Speakers bureau/paid presentations for a company or supplier (The following conflicts were disclosed) - None
- 3A. Paid employee for a company or supplier (The following conflicts were disclosed) - None
- 3B. Paid consultant for a company or supplier (The following conflicts were disclosed) - None
- 3C. Unpaid consultants for a company or supplier (The following conflicts were disclosed) - None
4. Stock or stock options in a company or supplier (The following conflicts were disclosed) - None
5. Research support from a company or supplier as a Principal Investigator (The following conflicts were disclosed) - None
6. Other financial or material support from a company or supplier (The following conflicts were disclosed) - None
7. Royalties, financial or material support from publishers (The following conflicts were disclosed) - None
8. Medical/Orthopaedic publications editorial/governing board (The following conflicts were disclosed) - None
9. Board member/committee appointments for a society (The following conflicts were disclosed) - None

**Each author must sign AND print or type his/her name, date and submit a separate form**

In addition, one BLINDED Conflict of Interest form (no author names used) should be submitted per manuscript with all author disclosures.

William L Johns



10/29/19

Author Name (Print or Type)

Author Signature

Date

**CONFLICT OF INTEREST STATEMENT**

***American Association of Hip and Knee Surgeons***

(Adopted from the American Academy of Orthopaedic Surgeons disclosure statement)

The following form **must be filled out completely and submitted by each author (example, 6 authors, 6 forms).**  
**All items require a response. If there is no relevant disclosure for a given item, enter "None."**

Manuscript Title - Tourniquet and Tranexamic Acid Use in Total Knee Arthroplasty

- 1. Royalties from a company or supplier (The following conflicts were disclosed) - None
- 2. Speakers bureau/paid presentations for a company or supplier (The following conflicts were disclosed) - None
- 3A. Paid employee for a company or supplier (The following conflicts were disclosed) - None
- 3B. Paid consultant for a company or supplier (The following conflicts were disclosed) - None
- 3C. Unpaid consultants for a company or supplier (The following conflicts were disclosed) - None
- 4. Stock or stock options in a company or supplier (The following conflicts were disclosed) - None
- 5. Research support from a company or supplier as a Principal Investigator (The following conflicts were disclosed) - None
- 6. Other financial or material support from a company or supplier (The following conflicts were disclosed) - None
- 7. Royalties, financial or material support from publishers (The following conflicts were disclosed) - None
- 8. Medical/Orthopaedic publications editorial/governing board (The following conflicts were disclosed) - None
- 9. Board member/committee appointments for a society (The following conflicts were disclosed) - None

**Each author must sign AND print or type his/her name, date and submit a separate form**

In addition, one BLINDED Conflict of Interest form (no author names used) should be submitted per manuscript with all author disclosures.

Ronald Langstaff



11/11/19

Author Name (Print or Type)

Author Signature

Date

**CONFLICT OF INTEREST STATEMENT**

***American Association of Hip and Knee Surgeons***

(Adopted from the American Academy of Orthopaedic Surgeons disclosure statement)

The following form **must be filled out completely and submitted by each author (example, 6 authors, 6 forms).**  
**All items require a response. If there is no relevant disclosure for a given item, enter "None."**

Manuscript Title - Tourniquet and Tranexamic Acid Use in Total Knee Arthroplasty

1. Royalties from a company or supplier (The following conflicts were disclosed) - None
2. Speakers bureau/paid presentations for a company or supplier (The following conflicts were disclosed) - None
- 3A. Paid employee for a company or supplier (The following conflicts were disclosed) - None
- 3B. Paid consultant for a company or supplier (The following conflicts were disclosed) - None
- 3C. Unpaid consultants for a company or supplier (The following conflicts were disclosed) - None
4. Stock or stock options in a company or supplier (The following conflicts were disclosed) - None
5. Research support from a company or supplier as a Principal Investigator (The following conflicts were disclosed) - None
6. Other financial or material support from a company or supplier (The following conflicts were disclosed) - None
7. Royalties, financial or material support from publishers (The following conflicts were disclosed) - None
8. Medical/Orthopaedic publications editorial/governing board (The following conflicts were disclosed) - None
9. Board member/committee appointments for a society (The following conflicts were disclosed) - None

**Each author must sign AND print or type his/her name, date and submit a separate form**

In addition, one BLINDED Conflict of Interest form (no author names used) should be submitted per manuscript with all author disclosures.

Vikas Vedi, MD



11/11/19

---

Author Name (Print or Type)

Author Signature

Date

**CONFLICT OF INTEREST STATEMENT**

***American Association of Hip and Knee Surgeons***

(Adopted from the American Academy of Orthopaedic Surgeons disclosure statement)

The following form **must be filled out completely and submitted by each author (example, 6 authors, 6 forms).**  
**All items require a response. If there is no relevant disclosure for a given item, enter "None."**

Manuscript Title - Tourniquet and Tranexamic Acid Use in Total Knee Arthroplasty

1. Royalties from a company or supplier (The following conflicts were disclosed)  
None
2. Speakers bureau/paid presentations for a company or supplier (The following conflicts were disclosed)  
None
- 3A. Paid employee for a company or supplier (The following conflicts were disclosed)  
None
- 3B. Paid consultant for a company or supplier (The following conflicts were disclosed)  
None
- 3C. Unpaid consultants for a company or supplier (The following conflicts were disclosed)  
None
4. Stock or stock options in a company or supplier (The following conflicts were disclosed)  
None
5. Research support from a company or supplier as a Principal Investigator (The following conflicts were disclosed)  
None
6. Other financial or material support from a company or supplier (The following conflicts were disclosed)  
None
7. Royalties, financial or material support from publishers (The following conflicts were disclosed)  
None
8. Medical/Orthopaedic publications editorial/governing board (The following conflicts were disclosed)  
Editorial board member, Journal of Arthroplasty  
Editorial board member, Annals of Orthopaedics, Trauma and Rehabilitation  
Editorial board member, Journal of Orthopaedics Surgery and Rehabilitation
9. Board member/committee appointments for a society (The following conflicts were disclosed)  
Committee member, Arthroscopy Association of North America (AANA)

**Each author must sign AND print or type his/her name, date and submit a separate form**

In addition, one BLINDED Conflict of Interest form (no author names used) should be submitted per manuscript with all author disclosures.

Nirav Patel



11/10/19

---

Author Name (Print or Type)

Author Signature

Date
